# Supplementary material for: Clonal relation between Salmonella enterica subspecies enterica serovar Dublin strains of bovine and food origin in Germany
Source: Front Vet Sci. 2023 May 25;10:1081611. doi: 10.3389/fvets.2023.1081611 (PMC10248260; doi:10.3389/fvets.2023.1081611)
Supplement: Supplementary Table 1 — Epidemiological metadata, NGS quality measures and MLST results of 174 S. Dublin organisms analyzed in this study. [file Table_1.XLSX]

## Sheet: Tabelle1
ID	Sample name	Bioproject	Source	State	Year	Total.reads	Theoretical.coverage	1stMatchSpezies	%1stMatchSpezies	# contigs	Assembly Size bp	N50	GC (%)	SISTR Serovar	SeqSero2 Serovar	MLST	clust_SNPs_15	clust_Alles_10
05PM0013	13	PRJNA678856	cattle	SN	2005	1831560	88	Salmonella enterica	96.12	27	4868726	488441	52.09	Dublin	Dublin	10	s	s
05PM0019	19	PRJNA678856	cattle	ST	2005	2346662	97	Salmonella enterica	94.68	28	4873585	493970	52.09	Dublin	Dublin	10	13	5
05PM0074	74	PRJNA678856	cattle	NI	2005	2861652	116	Salmonella enterica	94.55	27	4871981	493964	52.1	Dublin	Dublin	10	s	s
05PM0089	89	PRJNA678856	cattle	MV	2005	1798878	84	Salmonella enterica	95.56	25	4877186	493717	52.1	Dublin	Dublin	10	s	s
05PM0104	104	PRJNA678856	cattle	BY	2005	2239532	97	Salmonella enterica	91.72	31	4960799	405780	52.03	Dublin	Dublin	10	s	s
06PM0006	158	PRJNA678856	cattle	NI	2006	1496690	72	Salmonella enterica	95.63	27	4872886	493965	52.09	Dublin	Dublin	10	14	s
06PM0014	166	PRJNA678856	cattle	NI	2006	1091272	52	Salmonella enterica	95.64	28	4871651	478332	52.1	Dublin	Dublin	10	13	5
06PM0062	197	PRJNA678856	cattle	TH	2006	2577044	104	Salmonella enterica	91.67	29	4922197	478547	52.09	Dublin	Dublin	10	10	8
07PM0086	326	PRJNA678856	cattle	NI	2007	1184770	55	Salmonella enterica	95.44	27	4872255	494145	52.1	Dublin	Dublin	10	s	14
07PM0108	348	PRJNA678856	cattle	NI	2007	2093584	96	Salmonella enterica	95.32	26	4873961	493964	52.09	Dublin	Dublin	10	s	s
08PM0033	402	PRJNA678856	cattle	BY	2008	1877646	89	Salmonella enterica	95.79	28	4865633	477796	52.1	Dublin	Dublin	10	s	s
08PM0038	407	PRJNA678856	cattle	SH	2008	2067394	97	Salmonella enterica	95.37	23	4853020	560462	52.09	Dublin	Dublin	10	s	s
09PM0016	523	PRJNA678856	cattle	TH	2009	2181326	112	Salmonella enterica	93.53	28	4962233	493964	52.03	Dublin	Dublin		8	9
09PM0086	593	PRJNA678856	cattle	BB	2009	1697320	88	Salmonella enterica	96.61	26	4874509	493964	52.09	Dublin	Dublin	10	s	5
09PM0088	595	PRJNA678856	cattle	SH	2009	1364530	68	Salmonella enterica	96.33	28	4855858	494153	52.09	Dublin	Dublin	10	15	3
09PM0092	599	PRJNA678856	cattle	SH	2009	1890966	85	Salmonella enterica	94.91	28	4838361	494154	52.07	Dublin	Dublin	10	15	s
10PM0020	636	PRJNA678856	cattle	BB	2010	1345616	63	Salmonella enterica	95.87	31	4878552	420854	52.1	Dublin	Dublin	10	s	s
10PM0029	645	PRJNA678856	cattle	BY	2010	1397202	62	Salmonella enterica	94.92	28	4872814	494152	52.1	Dublin	Dublin	10	11	12
11PM0002	683	PRJNA678856	cattle	BY	2011	1830076	86	Salmonella enterica	95.75	26	4872737	494153	52.09	Dublin	Dublin	10	s	s
11PM0005	686	PRJNA678856	cattle	BB	2011	978894	47	Salmonella enterica	95.94	29	4872623	478548	52.1	Dublin	Dublin	10	10	8
11PM0021	702	PRJNA678856	cattle	SH	2011	2221150	99	Salmonella enterica	94.79	27	4833405	494153	52.11	Dublin	- 9:g,p:-	10	s	s
11PM0022	703	PRJNA678856	cattle	SH	2011	2299364	115	Salmonella enterica	92.85	28	4892137	494153	52.09	Dublin	Dublin	10	9	3
11PM0032	713	PRJNA678856	cattle	SH	2011	2232808	107	Salmonella enterica	96.23	27	4878622	494550	52.09	Dublin	Dublin	3734	16	s
11PM0112	793	PRJNA678856	cattle	BY	2011	1559886	67	Salmonella enterica	92.96	32	4996546	405826	52.04	Dublin	Dublin	10	11	12
11PM0229	910	PRJNA678856	cattle	NI	2011	1997320	101	Salmonella enterica	96.9	29	4873358	493964	52.09	Dublin	Dublin	10	17	15
11PM0240	921	PRJNA678856	cattle	NW	2011	1312492	68	Salmonella enterica	95.72	28	4920683	494444	52.09	Dublin	Dublin		s	s
11PM0244	925	PRJNA678856	cattle	BW	2011	1572076	77	Salmonella enterica	95.71	27	4869454	493964	52.09	Dublin	Dublin	10	18	16
12PM0039	975	PRJNA678856	cattle	SH	2012	1074442	54	Salmonella enterica	95.83	28	4846292	477774	52.1	Dublin	Dublin	10	s	s
12PM0041	977	PRJNA678856	cattle	SH	2012	2219984	111	Salmonella enterica	96.7	26	4872883	494153	52.1	Dublin	Dublin	10	19	10
12PM0129	1065	PRJNA678856	cattle	NW	2012	2372768	114	Salmonella enterica	96.46	28	4872906	493965	52.09	Dublin	Dublin	10	14	s
12PM0138	1074	PRJNA678856	cattle	SH	2012	2254490	89	Salmonella enterica	94.48	28	4855329	478546	52.08	Dublin	Dublin	10	20	10
12PM0139	1075	PRJNA678856	cattle	SH	2012	2108492	98	Salmonella enterica	95.2	27	4855444	494145	52.08	Dublin	Dublin	10	3	6
12PM0180	1116	PRJNA678856	cattle	SH	2012	2088462	102	Salmonella enterica	96.72	27	4878667	494331	52.1	Dublin	Dublin	10	21	17
12PM0181	1117	PRJNA678856	cattle	SH	2012	2136218	107	Salmonella enterica	96.99	26	4868335	493964	52.1	Dublin	Dublin	10	1	1
13PM0019	1161	PRJNA678856	cattle	BY	2013	2370396	110	Salmonella enterica	96.42	30	4873496	494153	52.1	Dublin	Dublin	10	4	4
13PM0035	1177	PRJNA678856	cattle	SH	2013	2827806	132	Salmonella enterica	96.48	30	4874692	508602	52.09	Dublin	Dublin	10	22	5
13PM0095	1237	PRJNA678856	cattle	NW	2013	1596242	78	Salmonella enterica	96.33	28	4865475	480069	52.1	Dublin	Dublin	10	s	s
13PM0143	1285	PRJNA678856	cattle	NI	2013	1869720	90	Salmonella enterica	96.04	26	4875057	494151	52.1	Dublin	Dublin	10	s	14
13PM0153	1295	PRJNA678856	cattle	SH	2013	1738306	82	Salmonella enterica	95.61	25	4853951	494154	52.08	Dublin	Dublin	10	s	s
13PM0164	1306	PRJNA678856	cattle	BY	2013	2282598	113	Salmonella enterica	96.13	28	4865843	477796	52.1	Dublin	Dublin	10	12	13
16PM0007	1670	PRJNA678856	cattle	SH	2016	1183120	48	Salmonella enterica	94.19	29	4859567	477774	52.08	Dublin	Dublin	10	3	s
16PM0008	1671	PRJNA678856	cattle	SH	2016	2403126	111	Salmonella enterica	95.23	27	4853805	494153	52.08	Dublin	Dublin	10	s	s
16PM0012	1675	PRJEB56661	cattle	SH	2016	2523306	121	Salmonella enterica	95.9	28	4871965	493964	52.09	Dublin	Dublin	10	1	1
16PM0024	1687	PRJNA678856	cattle	BY	2016	1314580	65	Salmonella enterica	95.89	31	4865984	477796	52.1	Dublin	Dublin	10	12	13
16PM0039	1702	PRJNA678856	cattle	BY	2016	2226662	106	Salmonella enterica	96.74	32	4873940	494153	52.1	Dublin	Dublin	10	4	4
16PM0057	1720	PRJNA678856	cattle	TH	2016	2808614	128	Salmonella enterica	94.24	29	4961451	493964	52.03	Dublin	Dublin		8	9
16PM0136	1799	PRJNA678856	cattle	BB	2016	2540220	116	Salmonella enterica	96.12	28	4875089	493970	52.09	Dublin	Dublin	10	23	18
16PM0173	1836	PRJNA678856	cattle	TH	2016	1520938	74	Salmonella enterica	95.38	29	4865831	493949	52.1	Dublin	Dublin	10	s	s
16PM0240	1903	PRJEB56661	cattle	SH	2016	1938198	99	Salmonella enterica	93.79	30	4915321	493963	52.08	Dublin	Dublin	10	1	1
16PM0244	1907	PRJEB56661	cattle	SH	2016	1809256	89	Salmonella enterica	96.26	26	4874501	493964	52.09	Dublin	Dublin	10	1	1
16PM0247	1909	PRJEB56661	cattle	SH	2016	2379546	111	Salmonella enterica	95.58	29	4874722	478584	52.1	Dublin	Dublin	10	s	s
16PM0249	1912	PRJEB56661	cattle	SH	2016	2449174	119	Salmonella enterica	96	25	4872672	494153	52.1	Dublin	Dublin	10	19	10
16PM0255	1918	PRJNA678856	cattle	BY	2016	1400224	56	Salmonella enterica	94.16	28	4872580	494152	52.09	Dublin	Dublin	10	11	12
16PM0265	1928	PRJNA678856	cattle	BY	2016	1998776	82	Salmonella enterica	94.37	28	4874852	494151	52.1	Dublin	Dublin	10	2	2
16PM0273	1936	PRJNA678856	cattle	NI	2016	2016160	96	Salmonella enterica	96.1	29	4874573	493964	52.09	Dublin	Dublin	10	22	5
16PM0276	1939	PRJEB56661	cattle	SH	2016	1461823	72	Salmonella enterica	96.2	27	4874021	493964	52.09	Dublin	Dublin	10	5	1
16PM0280	1943	PRJEB56661	cattle	SH	2016	2646164	121	Salmonella enterica	95.6	28	4873916	493971	52.1	Dublin	Dublin	10	7	7
16PM0284	1947	PRJNA678856	cattle	SH	2016	2497614	121	Salmonella enterica	96.09	28	4874573	493964	52.09	Dublin	Dublin	10	5	1
16PM0286	1949	PRJNA678856	cattle	NI	2016	1129664	47	Salmonella enterica	94.56	30	4871939	477759	52.1	Dublin	Dublin	10	24	19
16PM0288	1951	PRJNA678856	cattle	NI	2016	1032166	40	Salmonella enterica	54.33	33	4912135	410309	52.08	Dublin	Dublin	10	24	19
17PM0003	1975	PRJNA678856	cattle	SH	2017	2453014	116	Salmonella enterica	95.61	27	4874601	493971	52.09	Dublin	Dublin	10	7	7
17PM0032	2004	PRJNA678856	cattle	MV	2017	1314174	62	Salmonella enterica	94.01	33	4879152	417795	52.09	Dublin	Dublin	10	2	2
17PM0035	2007	PRJNA678856	cattle	NW	2017	1224530	58	Salmonella enterica	94.93	26	4874590	494151	52.1	Dublin	Dublin	10	2	2
17PM0052	2024	PRJNA678856	cattle	BY	2017	1096714	58	Salmonella enterica	96.66	27	4860784	494144	52.1	Dublin	Dublin	10	25	20
17PM0064	2036	PRJEB56661	cattle	SH	2017	1931162	95	Salmonella enterica	95.9	28	4875027	493964	52.09	Dublin	Dublin	10	1	1
17PM0080	2052	PRJNA678856	cattle	SH	2017	2301990	110	Salmonella enterica	96.08	29	4874594	493964	52.09	Dublin	Dublin	10	5	1
17PM0110	2082	PRJNA678856	cattle	MV	2017	2443730	118	Salmonella enterica	96.69	30	4874177	494153	52.1	Dublin	Dublin	10	4	4
17PM0145	2117	PRJNA678856	cattle	BY	2017	1986168	95	Salmonella enterica	96.23	26	4873435	494153	52.1	Dublin	Dublin	10	s	s
17PM0156	2128	PRJEB56661	cattle	SH	2017	2315206	109	Salmonella enterica	95.77	30	4873394	420339	52.1	Dublin	Dublin	10	20	10
17PM0184	2156	PRJNA678856	cattle	BY	2017	1605602	67	Salmonella enterica	95.05	32	4872885	478554	52.1	Dublin	Dublin	10	4	4
17PM0214	2186	PRJNA678856	cattle	SN	2017	2912074	139	Salmonella enterica	95.94	27	4860709	493940	52.1	Dublin	Dublin	10	s	s
17PM0222	2194	PRJNA678856	cattle	NI	2017	1693270	87	Salmonella enterica	96.32	30	4865536	405781	52.1	Dublin	Dublin	10	s	s
17PM0238	2210	PRJEB56661	cattle	SH	2017	2084980	102	Salmonella enterica	95.92	28	4871423	494153	52.1	Dublin	Dublin	10	s	3
17PM0246	2218	PRJNA678856	cattle	NI	2017	1590346	73	Salmonella enterica	75.54	28	4876065	493964	52.09	Dublin	Dublin		8	9
17PM0267	2239	PRJNA678856	cattle	ST	2017	1070944	48	Salmonella enterica	95.67	26	4873330	493965	52.1	Dublin	Dublin	10	s	s
17PM0274	2246	PRJEB56661	cattle	SH	2017	920446	47	Salmonella enterica	96.46	33	4873414	405793	52.1	Dublin	Dublin	10	26	21
17PM0278	2250	PRJEB56661	cattle	SH	2017	2038126	99	Salmonella enterica	96.04	28	4874644	493964	52.09	Dublin	Dublin	10	1	1
17PM0279	2251	PRJEB56661	cattle	SH	2017	1850608	92	Salmonella enterica	96.25	29	4869211	478539	52.1	Dublin	Dublin	10	27	11
17PM0302	2273	PRJEB56661	cattle	SH	2017	2278666	114	Salmonella enterica	96.21	29	4874360	493964	52.09	Dublin	Dublin	10	6	1
17PM0304	2275	PRJEB56661	cattle	SH	2017	2503060	124	Salmonella enterica	96.05	26	4874959	494151	52.1	Dublin	Dublin	10	2	2
17PM0307	2278	PRJEB56661	cattle	SH	2017	1185654	52	Salmonella enterica	95.45	26	4873302	493964	52.09	Dublin	Dublin	10	6	1
17PM0311	2282	PRJEB56661	cattle	SH	2017	2226754	107	Salmonella enterica	95.74	27	4869046	494152	52.11	Dublin	Dublin	10	28	11
17PM0313	2284	PRJEB56661	cattle	SH	2017	2240234	111	Salmonella enterica	96.15	26	4874144	493971	52.09	Dublin	Dublin	10	7	7
17PM0314	2285	PRJNA678856	cattle	SH	2017	1092300	47	Salmonella enterica	94.25	28	4874612	560270	52.1	Dublin	Dublin	10	3	6
18PM0001	2301	PRJNA678856	cattle	NI	2018	1249878	53	Salmonella enterica	94.77	28	4872488	494145	52.1	Dublin	Dublin	10	s	8
18PM0003	2303	PRJNA678856	cattle	BY	2018	1629598	79	Salmonella enterica	95.76	170	5273195	207613	51.85	Dublin	I 4:g,p:1,2	10	4	4
18PM0008	2308	PRJEB56661	cattle	SH	2018	1781558	86	Salmonella enterica	95.53	26	4874913	494151	52.1	Dublin	Dublin	10	2	2
18PM0009	2309	PRJEB56661	cattle	SH	2018	613914	33	Salmonella enterica	96.32	29	4873633	493964	52.09	Dublin	Dublin	10	6	1
18PM0013	2313	PRJEB56661	cattle	SH	2018	1513992	75	Salmonella enterica	95.87	29	4869115	477743	52.1	Dublin	Dublin	10	28	11
18PM0025	2325	PRJEB56661	cattle	SH	2018	1236572	59	Salmonella enterica	95.47	27	4866503	494132	52.11	Dublin	Dublin	10	27	11
18PM0026	2326	PRJNA678856	cattle	SH	2018	1262964	64	Salmonella enterica	96.45	28	4875086	477767	52.09	Dublin	Dublin	10	3	6
18PM0027	2327	PRJEB56661	cattle	SH	2018	1177368	59	Salmonella enterica	89.85	91	4944628	401855	52.15	Dublin	Dublin	10	7	7
18PM0065	2365	PRJNA678856	cattle	BY	2018	1885500	90	Salmonella enterica	96.12	30	4862586	405781	52.1	Dublin	Dublin	10	25	20
18PM0069	2369	PRJEB56661	cattle	SH	2018	746896	39	Salmonella enterica	96.43	28	4874092	493964	52.09	Dublin	Dublin	10	5	1
18PM0070	2370	PRJEB56661	cattle	SH	2018	672348	35	Salmonella enterica	95.97	27	4873484	494904	52.09	Dublin	Dublin	10	1	1
18PM0088	2388	PRJNA678856	cattle	SH	2018	1345640	53	Salmonella enterica	94.66	27	4872965	493964	52.09	Dublin	Dublin	10	5	1
18PM0117	2417	PRJNA678856	cattle	BW	2018	1894346	92	Salmonella enterica	96.16	28	4872074	493965	52.1	Dublin	Dublin	10	29	s
18PM0127	2427	PRJEB56661	cattle	SH	2018	633108	32	Salmonella enterica	96.17	38	4873524	303104	52.1	Dublin	Dublin	10	30	s
18PM0129	2429	PRJNA678856	cattle	SH	2018	1304078	58	Salmonella enterica	95.23	25	4878656	494331	52.1	Dublin	Dublin	10	21	17
18PM0155	2455	PRJEB56661	cattle	SH	2018	1285518	64	Salmonella enterica	95.88	27	4872025	494153	52.1	Dublin	Dublin	10	9	3
18PM0166	2466	PRJEB56661	cattle	SH	2018	1210032	58	Salmonella enterica	95.26	29	4869608	477744	52.09	Dublin	Dublin	10	1	1
18PM0175	2475	PRJEB56661	cattle	SH	2018	656070	33	Salmonella enterica	95.54	33	4910124	494153	52.08	Dublin	Dublin	10	9	3
18PM0176	2476	PRJEB56661	cattle	SH	2018	1421695	69	Salmonella enterica	95.89	27	4874267	493964	52.09	Dublin	Dublin	10	1	1
18PM0177	2477	PRJNA678856	cattle	SH	2018	913512	47	Salmonella enterica	96.42	28	4874135	477744	52.09	Dublin	Dublin	10	6	1
18PM0221	2521	PRJEB56661	cattle	SH	2018	630862	33	Salmonella enterica	96.31	28	4874147	493964	52.09	Dublin	Dublin	10	6	1
18PM0233	2533	PRJEB56661	cattle	SH	2018	636454	33	Salmonella enterica	88.93	224	5153704	262814	51.67	Dublin	Dublin	10	31	s
18PM0234	2534	PRJEB56661	cattle	SH	2018	1222664	59	Salmonella enterica	95.78	28	4873988	417433	52.09	Dublin	Dublin	10	6	1
18PM0235	2535	PRJEB56661	cattle	SH	2018	1193800	61	Salmonella enterica	96.43	27	4873299	494154	52.1	Dublin	Dublin	10	26	21
18PM0257	2557	PRJEB56661	cattle	SH	2018	1366216	67	Salmonella enterica	95.94	28	4871847	493964	52.09	Dublin	Dublin	10	1	1
18PM0258	2558	PRJEB56661	cattle	SH	2018	970068	45	Salmonella enterica	95.26	64	4871858	154048	52.11	Dublin	Dublin	10	5	1
18PM0274	2574	PRJEB56661	cattle	SH	2018	1293540	66	Salmonella enterica	96.04	25	4872972	494147	52.1	Dublin	Dublin	10	s	s
18PM0275	2575	PRJEB56661	cattle	SH	2018	733140	37	Salmonella enterica	95.89	32	4869734	361343	52.09	Dublin	Dublin		8	9
18PM0283	2583	PRJEB56661	cattle	SH	2018	1040604	49	Salmonella enterica	95.8	28	4873232	494153	52.1	Dublin	Dublin	10	32	22
18PM0284	2584	PRJEB56661	cattle	SH	2018	1167028	57	Salmonella enterica	95.64	26	4877171	494549	52.09	Dublin	Dublin	3734	16	s
18PM0285	2585	PRJEB56661	cattle	SH	2018	1378334	69	Salmonella enterica	96.04	26	4871475	494153	52.1	Dublin	Dublin	10	s	3
19PM0014	2613	PRJEB56661	cattle	SH	2019	1517052	68	Salmonella enterica	95	31	4874358	420150	52.09	Dublin	Dublin	10	1	1
19PM0021	2620	PRJEB56661	cattle	SH	2019	1897822	91	Salmonella enterica	95.76	30	4874616	405793	52.09	Dublin	Dublin	10	1	1
19PM0052	2651	PRJEB56661	cattle	SH	2019	2013014	95	Salmonella enterica	95.93	31	4875264	405793	52.09	Dublin	Dublin	10	1	1
19PM0053	2652	PRJEB56661	cattle	SH	2019	3683924	169	Salmonella enterica	95.85	30	4874923	420331	52.09	Dublin	Dublin	10	s	s
19PM0090	2689	PRJEB56661	cattle	SH	2019	2401092	107	Salmonella enterica	95.65	29	4874620	478547	52.09	Dublin	Dublin	10	1	1
19PM0108	2707	PRJEB56661	cattle	SH	2019	2123466	93	Salmonella enterica	95.22	26	4873902	493959	52.09	Dublin	Dublin	10	30	s
19PM0109	2708	PRJEB56661	cattle	SH	2019	1852344	87	Salmonella enterica	90.67	34	4963923	375930	52.04	Dublin	Dublin	10	31	s
19PM0126	2725	PRJEB56661	cattle	SH	2019	1767482	86	Salmonella enterica	96.07	29	4873867	477751	52.09	Dublin	Dublin	10	1	1
19PM0128	2727	PRJEB56661	cattle	SH	2019	1811050	87	Salmonella enterica	96.19	30	4874190	493964	52.09	Dublin	Dublin	10	1	1
19PM0213	2812	PRJEB56661	cattle	SH	2019	1512464	66	Salmonella enterica	94.87	37	4873950	281268	52.1	Dublin	Dublin	10	1	1
19PM0249	2848	PRJEB56661	cattle	SH	2019	2558648	112	Salmonella enterica	92.06	29	4968513	478512	52.02	Dublin	Dublin	10	33	23
19PM0252	2851	PRJEB56661	cattle	SH	2019	2076226	98	Salmonella enterica	95.97	27	4871353	477757	52.1	Dublin	Dublin	10	9	3
19PM0340	2939	PRJEB56661	cattle	SH	2019	1662176	75	Salmonella enterica	95.72	29	4873075	478563	52.1	Dublin	Dublin	10	s	s
19PM0341	2940	PRJEB56661	cattle	SH	2019	2246212	98	Salmonella enterica	94.68	32	4875077	477774	52.09	Dublin	Dublin	10	2	2
19PM0343	2942	PRJEB56661	cattle	SH	2019	1540642	71	Salmonella enterica	95.74	40	4873980	315839	52.1	Dublin	Dublin	10	7	7
20PM0004	2986	PRJEB56661	cattle	SH	2020	1645828	77	Salmonella enterica	95.74	31	4874148	430608	52.09	Dublin	Dublin	10	1	1
20PM0005	2987	PRJEB56661	cattle	SH	2020	1883256	88	Salmonella enterica	95.82	28	4868939	478540	52.1	Dublin	Dublin	10	s	1
20PM0006	2988	PRJEB56661	cattle	SH	2020	2026596	93	Salmonella enterica	95.49	31	4874083	478547	52.1	Dublin	Dublin	10	1	1
20PM0218	3200	PRJEB56661	cattle	SH	2020	1643632	79	Salmonella enterica	95.9	31	4874965	416922	52.09	Dublin	Dublin	10	2	2
20PM0219	3201	PRJEB56661	cattle	SH	2020	1538698	70	Salmonella enterica	94.78	37	4875530	314638	52.09	Dublin	Dublin	10	s	s
20PM0232	3214	PRJEB56661	cattle	SH	2020	1643852	76	Salmonella enterica	95.63	31	4873423	416812	52.1	Dublin	Dublin	10	32	22
20PM0351	3313	PRJEB56661	cattle	SH	2020	1903868	89	Salmonella enterica	95.39	30	4874959	560268	52.1	Dublin	Dublin	10	2	2
20PM0387	3348	PRJEB56661	cattle	SH	2020	1891228	88	Salmonella enterica	95.28	29	4874161	458356	52.09	Dublin	Dublin	10	1	1
20PM0401	3362	PRJEB56661	cattle	SH	2020	1927392	90	Salmonella enterica	95.42	28	4874685	493964	52.09	Dublin	Dublin	10	1	1
20PM0421	3382	PRJEB56661	cattle	SH	2020	1208334	55	Salmonella enterica	95.14	35	4876615	331805	52.1	Dublin	Dublin	10	1	1
20PM0422	3383	PRJEB56661	cattle	SH	2020	2530338	111	Salmonella enterica	94.83	30	4875166	405793	52.09	Dublin	Dublin	10	2	2
20PM0431	3392	PRJEB56661	cattle	SH	2020	997650	46	Salmonella enterica	95.42	36	4873035	415591	52.1	Dublin	Dublin	10	s	s
21PM0010	3414	PRJEB56661	soft cheese	SH	2010	1678760	77	Salmonella enterica	95.19	28	4871054	559742	52.1	Dublin	Dublin	10	s	s
21PM0011	3415	PRJEB56661	beef/minced meat	NI	2010	1859072	88	Salmonella enterica	95.57	37	4861685	315604	52.12	Dublin	Dublin	10	s	s
21PM0012	3416	PRJEB56661	beef/minced meat	NI	2011	2418234	103	Salmonella enterica	94.82	29	4872980	493964	52.09	Dublin	Dublin	10	17	15
21PM0013	3417	PRJEB56661	beef/minced meat	NI	2011	2512628	113	Salmonella enterica	95.15	29	4874930	417635	52.09	Dublin	Dublin	10	s	s
21PM0014	3418	PRJEB56661	beef/minced meat	SH	2012	1700108	74	Salmonella enterica	91.41	42	4964465	248732	52.02	Dublin	Dublin	10	s	s
21PM0015	3419	PRJEB56661	beef/minced meat	BW	2013	1958786	90	Salmonella enterica	96.06	33	4802896	343951	52.15	Dublin	Dublin	10	s	s
21PM0016	3420	PRJEB56661	beef/minced meat	MV	2013	2018508	94	Salmonella enterica	95.44	30	4875078	420331	52.1	Dublin	Dublin	10	3	6
21PM0017	3421	PRJEB56661	beef/minced meat	NI	2013	2233816	99	Salmonella enterica	94.86	33	4872759	494146	52.1	Dublin	Dublin	10	10	8
21PM0018	3422	PRJEB56661	beef/minced meat	NW	2013	1590808	73	Salmonella enterica	95.16	32	4874597	405793	52.1	Dublin	Dublin	10	s	s
21PM0019	3423	PRJEB56661	beef/minced meat	SN	2014	2124184	102	Salmonella enterica	96.04	27	4874537	478592	52.09	Dublin	Dublin	10	18	16
21PM0020	3424	PRJEB56661	beef/minced meat	BW	2014	2288966	109	Salmonella enterica	95.83	30	4856700	405781	52.09	Dublin	Dublin	10	s	s
21PM0021	3425	PRJEB56661	beef/minced meat	BW	2014	2137266	94	Salmonella enterica	95.52	32	4872535	494153	52.1	Dublin	Dublin	10	4	4
21PM0022	3426	PRJEB56661	beef/minced meat	NI	2015	2200688	103	Salmonella enterica	95.62	30	4865265	405781	52.1	Dublin	Dublin	10	12	13
21PM0023	3427	PRJEB56661	beef/minced meat	NW	2015	1867146	90	Salmonella enterica	95.93	28	4869890	405803	52.1	Dublin	Dublin	10	29	s
21PM0024	3428	PRJEB56661	beef/minced meat	SH	2015	2401900	110	Salmonella enterica	95.42	27	4867235	494338	52.11	Dublin	Dublin	10	34	24
21PM0025	3429	PRJEB56661	beef/minced meat	SH	2015	1398716	60	Salmonella enterica	94.43	40	4867387	477893	52.11	Dublin	Dublin	10	34	24
21PM0026	3430	PRJEB56661	beef/minced meat	BW	2016	1897374	88	Salmonella enterica	95.28	28	4864363	493847	52.1	Dublin	Dublin	10	s	s
21PM0027	3431	PRJEB56661	beef/minced meat	BW	2016	2845142	143	Salmonella enterica	96.06	29	4873946	417791	52.09	Dublin	Dublin	10	s	s
21PM0028	3432	PRJEB56661	beef/minced meat	NW	2016	2527526	120	Salmonella enterica	95.68	27	4874529	493964	52.09	Dublin	Dublin	10	23	18
21PM0029	3433	PRJEB56661	beef/minced meat	NI	2016	3106278	144	Salmonella enterica	95.67	27	4873233	478528	52.09	Dublin	Dublin	10	s	s
21PM0030	3434	PRJEB56661	beef/minced meat	BW	2017	3461050	154	Salmonella enterica	95.04	30	4871246	405793	52.1	Dublin	Dublin	10	s	s
21PM0031	3435	PRJEB56661	beef/minced meat	NW	2017	3109976	139	Salmonella enterica	95.55	30	4874287	493964	52.09	Dublin	Dublin	10	1	1
21PM0032	3436	PRJEB56661	beef/minced meat	BW	2017	2223682	109	Salmonella enterica	95.92	28	4875334	478562	52.1	Dublin	Dublin	10	3	6
21PM0033	3437	PRJEB56661	beef/minced meat	ST	2017	2554434	116	Salmonella enterica	94.95	28	4874641	405793	52.1	Dublin	Dublin	10	s	s
21PM0042	3446	PRJEB56661	beef/minced meat	SH	2019	2409514	108	Salmonella enterica	94.79	28	4874538	493964	52.09	Dublin	Dublin	10	1	1
21PM0043	3447	PRJEB56661	beef/minced meat	SH	2019	3072076	140	Salmonella enterica	95.03	29	4865905	478561	52.1	Dublin	Dublin	10	33	23
21PM0044	3448	PRJEB56661	beef/minced meat	SN	2020	3048206	138	Salmonella enterica	95.23	27	4863674	493964	52.1	Dublin	Dublin	10	s	s
21PM0045	3449	PRJEB56661	beef/minced meat	ST	2020	2957122	133	Salmonella enterica	95.29	27	4877211	494431	52.1	Dublin	Dublin	10	s	s
21PM0046	3450	PRJEB56661	beef/minced meat	BY	2020	2756294	127	Salmonella enterica	95.31	27	4874754	494151	52.1	Dublin	Dublin	10	s	2
21PM0047	3451	PRJEB56661	beef/minced meat	Berlin	2020	2599134	125	Salmonella enterica	95.77	25	4872878	494148	52.09	Dublin	Dublin	10	s	2
21PM0048	3452	PRJEB56661	cattle	SH	2021	2239294	99	Salmonella enterica	93.78	104	4969386	478540	51.85	Dublin	Dublin	10	1	1
21PM0079	3479	PRJEB56661	cattle	SH	2021	1393822	62	Salmonella enterica	94.83	36	4874360	359240	52.1	Dublin	Dublin	10	1	1
